# Supplementary material for: Healthy Lung Vessel Morphology Derived From Thoracic Computed Tomography
Source: PubMed Central journal article supplement (PMC5932382; doi:10.3389/fphys.2018.00346), 2018-04-10
Supplement: DataSheet1.pdf [file DataSheet1.pdf]

### Calculation of sum-of-angles metric

The sum-of-angles metric (SOAM) was calculated following Bullitt et al. (Bullitt et al., 2003).  $n$  points ( $p$ ) with 1 mm distance from each other are identified along the optimized vessel path with sub-voxel accuracy. For any point  $p_k$  the linear sections between the previous and the subsequent point define the vectors

$$v_1 = p_k - p_{k-1} \text{ and} \quad (1)$$

$$v_2 = p_{k+1} - p_k \quad (2)$$

with  $p_0$  being the start point of the vessel path. The in-plane angle in radian between these two vectors is given by

$$\theta_k = \cos^{-1} \left( \left( \frac{v_1}{|v_1|} \right) \cdot \left( \frac{v_2}{|v_2|} \right) \right) \quad (3)$$

where  $\theta_k \in [0, \pi]$  and  $|v_1|$  and  $|v_2|$  are the lengths of the vectors  $v_1$  and  $v_2$ , respectively. SOAM is calculated by summing up the angles between adjacent sections of a vessel segment and dividing the result by the length of the vessel segment, which is represented by the cumulative length of the sections used:

$$SOAM = \frac{\sum_{k=1}^{n-2} \alpha_k}{\sum_{k=1}^{n-1} |p_k - p_{k-1}|} \quad (4)$$

Any remaining piece of the vessel path within 1 mm of the last point  $p_n$  was not considered in the analysis. Only vessel segments with at least two sections were analyzed.

### Reference

Bullitt, E., Gerig, G., Pizer, S.M., Lin, W.L., and Aylward, S.R. (2003). Measuring tortuosity of the intracerebral vasculature from MRA images. *IEEE Trans. Med. Imaging* 22, 1163-1171. doi: 10.1109/TMI.2003.816964
