# Supplementary material for: Healthy Lung Vessel Morphology Derived From Thoracic Computed Tomography
Source: PubMed Central journal article supplement (PMC5932382; doi:10.3389/fphys.2018.00346), 2018-04-10
Supplement: Image2.pdf [file Image2.pdf]

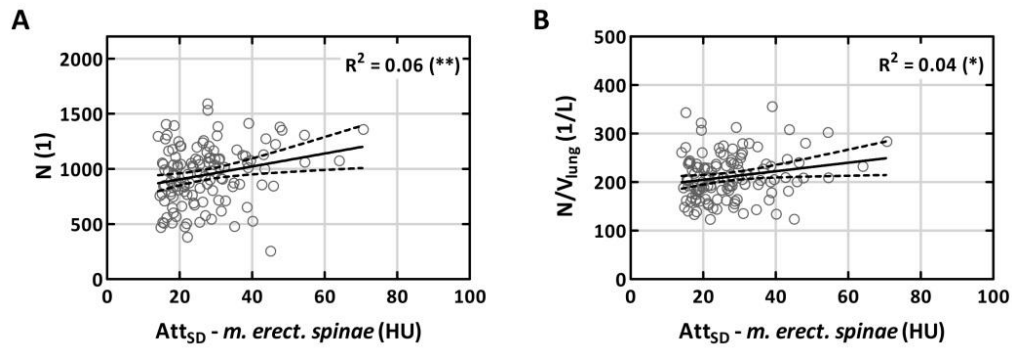

**Supplementary Figure 2** | Number of vessel segments (A) and vessel density (B) over image noise assessed by standard deviation of X-ray attenuation of the *musculus erector spinae*.  $N$ , sum of arterial and venous vessel segments in both lungs;  $V_{lung}$ , lung volume determined from CT image;  $Att_{SD}$ , standard deviation of the X-ray attenuation in the *musculus erector spinae*;  $R^2$ , coefficient of determination of the linear regression; \* and \*\*: slope significantly non-zero,  $p < 0.05$  and  $p < 0.01$ ; dashed lines represent 95% confidence bands.
