# Supplementary material for: Healthy Lung Vessel Morphology Derived From Thoracic Computed Tomography
Source: PubMed Central journal article supplement (PMC5932382; doi:10.3389/fphys.2018.00346), 2018-04-10
Supplement: Image3.pdf [file Image3.pdf]

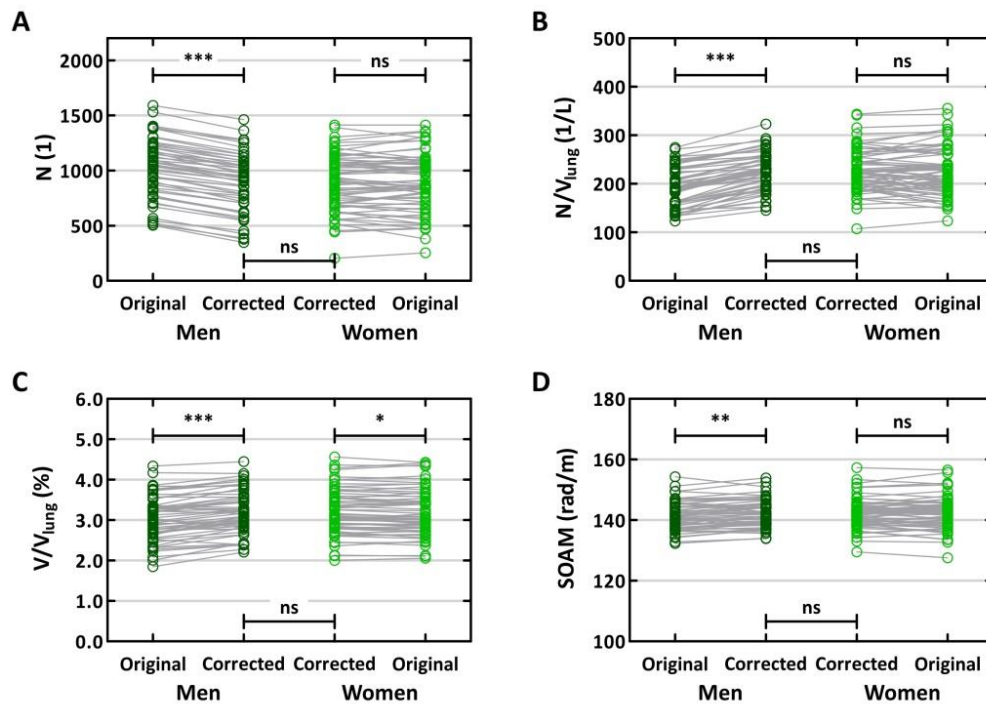

**Supplementary Figure 3** | Number of vessel segments (A), vessel density (B), normalized vessel volume (C), and tortuosity (D) for men and women as measured and corrected to the average X-ray attenuation in the *truncus pulmonalis* of 370 HU, the average age of 60 years, and female gender. N, sum of arterial and venous vessel segments in both lungs;  $V_{\text{lung}}$ , lung volume determined from CT image; V, volume of vessel segments with diameters between 2-10 mm in both lungs; SOAM, tortuosity of vessel segments assessed by sum-of-angles metric; \* and \*\*\*: significant differences assessed by paired and unpaired *U*-test,  $p < 0.05$  and  $p < 0.001$ ; ns, not significant.
