# Supplementary material for: Healthy Lung Vessel Morphology Derived From Thoracic Computed Tomography
Source: PubMed Central journal article supplement (PMC5932382; doi:10.3389/fphys.2018.00346), 2018-04-10
Supplement: Table1.pdf [file Table1.pdf]

**Supplementary Table 1** | Tortuosity for arteries, veins and all vessels by gender.

|                          |                    | <b>All subjects<br/>(n=123)</b> | <b>Men<br/>(n=55)</b> | <b>Women<br/>(n=68)</b> |
|--------------------------|--------------------|---------------------------------|-----------------------|-------------------------|
| <b>Mean DM<br/>(%)</b>   | <b>Arteries</b>    | 3.20 (3.06-3.41)                | 3.20 (3.03-3.36)      | 3.19 (3.06-3.44)        |
|                          | <b>Veins</b>       | 3.15 (3.03-3.27)                | 3.12 (3.02-3.19)      | 3.17 (3.04-3.33)        |
|                          | <b>All vessels</b> | 3.18 (3.04-3.32)                | 3.13 (3.03-3.29)      | 3.22 (3.07-3.37)        |
| <b>Median<br/>DM (%)</b> | <b>Arteries</b>    | 2.64 (2.52-2.79)                | 2.61 (2.49-2.73)      | 2.67 (2.54-2.80)        |
|                          | <b>Veins</b>       | 2.55 (2.47-2.65)                | 2.52 (2.43-2.63)      | 2.59 (2.49-2.66)        |
|                          | <b>All vessels</b> | 2.60 (2.52-2.71)                | 2.58 (2.48-2.69)      | 2.62 (2.54-2.72)        |

Values are given as median (interquartile range) for both lungs. DM, tortuosity of vessel segments assessed by distance metric.
