# Supplementary material for: Healthy Lung Vessel Morphology Derived From Thoracic Computed Tomography
Source: PubMed Central journal article supplement (PMC5932382; doi:10.3389/fphys.2018.00346), 2018-04-10
Supplement: Table2.pdf [file Table2.pdf]

**Supplementary Table 2** | Number of vessel segments and vessel density for arteries and veins by diameter and gender.

|                    |                                 | <b>Diameter range</b> | <b>All subjects (n=123)</b> | <b>Men (n=55)</b>   | <b>Women (n=68)</b> |                    |
|--------------------|---------------------------------|-----------------------|-----------------------------|---------------------|---------------------|--------------------|
| <b>N (1)</b>       | <b>Arteries</b>                 | 8-10 mm               | 5 (3-7)                     | 5 (3-8)             | 4 (3-6)             |                    |
|                    |                                 | 6-8 mm                | 16 (12-23)                  | 21 (15-27)          | 14 (11-20)          |                    |
|                    |                                 | 4-6 mm                | 64 (51-83)                  | 72 (61-92)          | 59 (45-70)          |                    |
|                    |                                 | 2-4 mm                | 392 (321-476)               | 440 (337-509)       | 364 (280-434)       |                    |
|                    |                                 | Total                 | 487 (390-587)               | 536 (420-617)       | 445 (364-543)       |                    |
|                    | <b>Veins</b>                    | 8-10 mm               | 4 (2-6)                     | 5 (3-7)             | 4 (2-6)             |                    |
|                    |                                 | 6-8 mm                | 18 (12-22)                  | 19 (13-25)          | 18 (11-22)          |                    |
|                    |                                 | 4-6 mm                | 66 (55-78)                  | 74 (57-86)          | 62 (52-73)          |                    |
|                    |                                 | 2-4 mm                | 382 (307-443)               | 397 (326-445)       | 366 (283-437)       |                    |
|                    |                                 | Total                 | 471 (371-551)               | 499 (395-562)       | 445 (360-527)       |                    |
|                    | <b>All vessels</b>              | 8-10 mm               | 9 (6-12)                    | 10 (7-15)           | 8 (5-11))           |                    |
|                    |                                 | 6-8 mm                | 34 (25-44)                  | 41 (29-49)          | 31 (23-41)          |                    |
|                    |                                 | 4-6 mm                | 134 (102-159)               | 146 (121-183)       | 118 (96-140)        |                    |
|                    |                                 | 2-4 mm                | 797 (623-905)               | 836 (655-949)       | 728 (565-884)       |                    |
|                    |                                 | Total                 | 977 (768-1115)              | 1042 (825-1206)     | 867 (711-1060)      |                    |
|                    | <b>N/V<sub>lung</sub> (1/L)</b> | <b>Arteries</b>       | 8-10 mm                     | 1.1 (0.6-1.5)       | 1.1 (0.5-1.5)       | 1.1 (0.7-1.6)      |
|                    |                                 |                       | 6-8 mm                      | 3.7 (2.9-4.9)       | 3.8 (3.2-4.7)       | 3.6 (2.7-5.1)      |
|                    |                                 |                       | 4-6 mm                      | 14.1 (12.0-17.6)    | 14.2 (11.8-17.5)    | 14.1 (12.1-18.0)   |
|                    |                                 |                       | 2-4 mm                      | 84.5 (70.6-101.7)   | 78.9 (64.3-96.2)    | 90.5 (77.7-106.2)  |
|                    |                                 |                       | Total                       | 106.7 (87.8-122.5)  | 98.1 (82.0-118.1)   | 111.4 (94.8-126.0) |
| <b>Veins</b>       |                                 | 8-10 mm               | 0.9 (0.6-1.4)               | 0.9 (0.6-1.4)       | 0.9 (0.5-1.4)       |                    |
|                    |                                 | 6-8 mm                | 3.8 (2.8-5.3)               | 3.6 (2.5-4.6)       | 4.4 (2.9-5.5)       |                    |
|                    |                                 | 4-6 mm                | 15.1 (12.0-17.9)            | 14.4 (11.6-16.6)    | 16.1 (13.0-19.0)    |                    |
|                    |                                 | 2-4 mm                | 80.3 (67.8-94.5)            | 73.7 (61.9-84.2)    | 87.9 (73.1-102.0)   |                    |
|                    |                                 | Total                 | 101.9 (84.6-119.0)          | 90.2 (77.7-106.7)   | 111.1 (95.6-122.7)  |                    |
| <b>All vessels</b> |                                 | 8-10 mm               | 2.0 (1.3-2.8)               | 2.0 (1.3-3.0)       | 2.0 (1.4-2.7)       |                    |
|                    |                                 | 6-8 mm                | 7.7 (6.0-9.8)               | 7.5 (6.0-9.3)       | 8.1 (6.0-10.3)      |                    |
|                    |                                 | 4-6 mm                | 29.9 (24.9-34.6)            | 28.8 (24.4-33.7)    | 30.1 (25.4-36.1)    |                    |
|                    |                                 | 2-4 mm                | 167.7 (139.1-196.3)         | 153.7 (125.1-181.0) | 176.1 (151.9-209.3) |                    |
|                    |                                 | Total                 | 206.0 (181.5-237.8)         | 191.3 (160.6-203.0) | 216.7 (192.8-260.7) |                    |

Values are given as median (interquartile range) for both lungs. N, number of vessel segments; V<sub>lung</sub>, lung volume determined from CT image.
